# Supplementary material for: Assessment of urinary 15‐F2‐isoprostanes in dogs with urothelial carcinoma of the urinary bladder and other lower urinary tract diseases
Source: PubMed Central journal article supplement (PMC7694844; doi:10.1111/jvim.15877), 2020-09-16
Supplement: JVIM-34-2454-s001.pdf [file JVIM-34-2454-s001.pdf]

**Supplemental Table.** Dogs diagnosed with NNLUTD, the corresponding diagnosis/diagnoses, and the diagnostic tests utilized to obtain diagnosis. AUS, abdominal ultrasound; HP, histopathology; NNLUTD, non-neoplastic lower urinary tract disease.

| <b>Dog</b> | <b>Diagnosis/Diagnoses</b>                                       | <b>Method(s) of Diagnosis</b>      |
|------------|------------------------------------------------------------------|------------------------------------|
| 1          | Urinary bladder mass (Non-diagnostic)                            | Cystoscopy; HP                     |
| 2          | Urinary incontinence (open for cause); Bacterial cystitis        | Cystoscopy; Urine culture          |
| 3          | Urinary bladder proprial fibrosis                                | Cystoscopy; HP                     |
| 4          | Chronic cystitis                                                 | Cystoscopy; HP                     |
| 5          | Thickened/proliferative urethra (Non-diagnostic)                 | Cystoscopy; HP                     |
| 6          | Necrohemorrhagic cystitis                                        | Cystoscopy; HP                     |
| 7          | Proliferative cystitis; Calcium oxalate urocystoliths            | Cystoscopy; HP; Stone analysis     |
| 8          | Bacterial cystitis (chronic)                                     | Cystoscopy; HP; Urine culture      |
| 9          | Recurrent bacterial cystitis                                     | Cystoscopy; Urine culture          |
| 10         | Anogenital cleft                                                 | Cystoscopy                         |
| 11         | Cystitis and lymphoid follicle                                   | Cystoscopy; HP                     |
| 12         | Recurrent bacterial cystitis                                     | Cystoscopy; Urine culture          |
| 13         | Recurrent bacterial cystitis; Recurrent urocystoliths (struvite) | AUS; Stone analysis; Urine culture |
| 14         | Persistent vaginal septum; Recurrent bacterial cystitis          | Cystoscopy; Urine culture          |
| 15         | Urocystoliths (calcium oxalate)                                  | Cystoscopy, Stone analysis         |
| 16         | Urocystoliths (calcium oxalate)                                  | Cystoscopy, Stone analysis         |
| 17         | Ectopic ureter, bacterial cystitis                               | Cystoscopy; Urine culture          |
| 18         | Reflex dysynergia                                                | Cystoscopy                         |
| 19         | Inflammatory urothelial polyp, non-suppurative vaginitis         | Cystoscopy; HP                     |
| 20         | Ectopic ureters                                                  | Cystoscopy                         |
| 21         | Lymphoplasmacytic cystitis and urethritis                        | Cystoscopy; HP                     |
| 22         | Urinary incontinence (open for cause)                            | AUS; Urinalysis                    |
| 23         | Ectopic ureter                                                   | Cystoscopy                         |
| 24         | Urinary bladder polyp, chronic cystitis                          | Cystoscopy; HP                     |
| 25         | Ulcerative cystitis                                              | Cystoscopy; HP                     |
| 26         | Calcium oxalate urocystoliths                                    | Cystoscopy, Stone analysis         |
| 27         | Primary renal hematuria                                          | Cystoscopy; Urinalysis             |
| 28         | Lymphocytic follicular cystitis                                  | Cystoscopy; HP                     |
| 29         | Polypoid and hemorrhagic cystitis; Cystitis glandularis          | Cystoscopy; HP                     |
| 30         | Right intramural ectopic ureter                                  | Cystoscopy                         |
